# Supplementary material for: The positive effect of water on photo-induced step transfer-addition & radical-termination (START) polymerization
Source: Royal Society of Chemistry journal article supplement (doi:10.1039/c7ra01925d), 2017-01-01
Supplement: c7ra01925d1.pdf [file c7ra01925d1.pdf]

## Supporting Information

# Positive effect of water on photo-induced Step Transfer-Addition & Radical-Termination (START) polymerization

Tianchi Xu, Lifan Zhang,\* Zhenping Cheng,\* and Xiulin Zhu

Suzhou Key Laboratory of Macromolecular Design and Precision Synthesis, Jiangsu Key Laboratory of Advanced Functional Polymer Design and Application, State and Local Joint Engineering Laboratory for Novel Functional Polymeric Materials, Department of Polymer Science and Engineering, College of Chemistry, Chemical Engineering and Materials Science, Soochow University, Suzhou 215123, China

## Contents

### Supplementary Experiments for the Polymerization

**Table S1.** Failed trials to further enhance the polymerization efficiency

**Figure S1.** The actual polymerization phenomena before and after the polymerization. (a) Picture taken instantly once completion of the polymerization, and (b) picture taken after standing-still for 2 minutes

**Figure S2.** The total NMR ( $^1\text{H}$  and  $^{19}\text{F}$ ) spectra for one polymer sample  $(\text{A2B3})_n$

**Figure S3.** Modification for the alternating copolymer  $(\text{A2B3})_n$  and the corresponding NMR ( $^1\text{H}$  and  $^{19}\text{F}$ ) spectra.

**Figure S4.**  $^{19}\text{F}$  NMR spectrum for **A2** ( $\text{C}_6\text{F}_{12}\text{I}_2$ ) in  $\text{CDCl}_3$ .

**Table S1.** Failed trials to further enhancing the polymerization efficiency

| Entry          | $[\text{A2}]_0:[\text{B3}]_0:[\text{Ru}(\text{bpy})_3\text{Cl}_2]_0:[\text{As Ac-Na}]_0:[\text{Additive}]_0$ | Additive           | Conv. (%) | $M_{n,\text{GPC}}$ (g/mol) | $M_w/M_n$ |
|----------------|--------------------------------------------------------------------------------------------------------------|--------------------|-----------|----------------------------|-----------|
| 1              | 1:1:0.02:0.5:0.5                                                                                             | 15-Crown-5         | 72.8      | 8100                       | 1.74      |
| 2              | 1:1:0.02:0.5:0.2                                                                                             | <sup>b</sup> TBABr | 71.7      | 8400                       | 1.65      |
| 3              | 1:1:0.02:0.5:0.08                                                                                            | <sup>c</sup> SLS   | 74.3      | 8500                       | 1.86      |
| <sup>a</sup> 4 | 1:1:0.02:0.5:0.08                                                                                            | <sup>c</sup> SLS   | 73.8      | 11700                      | 2.34      |

Polymerization conditions:  $n_{(B3)} = 0.5$  mmol,  $V_{(1,4\text{-dioxane})}:V_{(\text{MeOH})}:V_{(\text{Water})} = 3:1:3$ ,  $V_{(\text{Total solvent})} = 7.0$  mL, Time = 12 h, irradiation under blue LED at room temperature. <sup>a</sup>Addition of 0.14 equiv of n-Hexadecane, <sup>b</sup>TBABr: tetrabutyl ammonium bromide. <sup>c</sup>SLS: sodium lauryl sulfate (3.5 wt%).

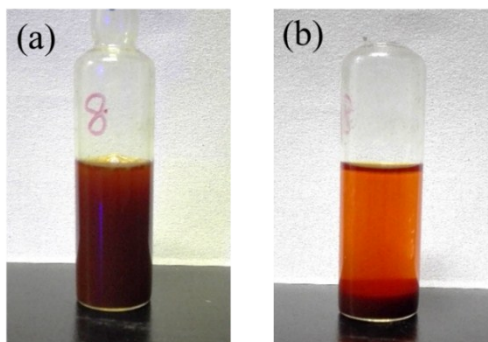

**Figure S1.** The actual polymerization phenomena before and after the polymerization (Polymerization conditions:  $[A2]_0:[B3]_0:[Ru(bpy)_3Cl_2]_0:[AsAc-Na]_0 = 1:1:0.02:0.5$ ,  $n_{(B)} = 0.5$  mmol,  $V_{(1,4\text{-dioxane})}:V_{(\text{MeOH})}:V_{(\text{Water})} = 3:1:3$ ,  $V_{(\text{Total solvent})} = 7.0$  mL, irradiation under blue LED at room temperature, Time = 12 h). (a) Picture taken instantly once completion of the polymerization, and (b) picture taken after standing-still for 2 minutes.

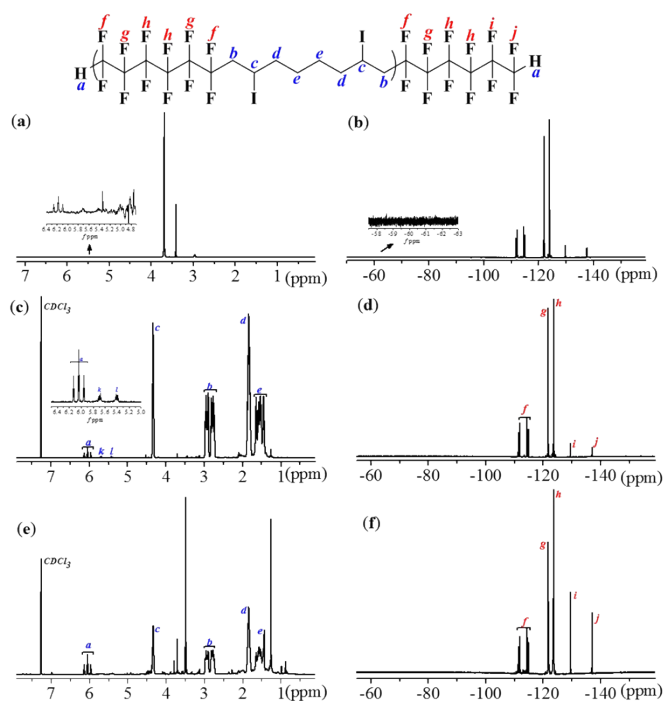

**Figure S2.** The total NMR ( $^1\text{H}$  and  $^{19}\text{F}$ ) spectra for one polymer sample  $(\text{A2B3})_n$ . (a) *in-situ*  $^1\text{H}$  NMR spectrum of polymerization system; (b) *in-situ*  $^{19}\text{F}$  NMR spectrum of polymerization system; (c)  $^1\text{H}$  NMR spectrum of the perfluorocarbon-containing alternating copolymer  $(\text{A2B3})_n$  (Yield% = 67.9%,  $M_{n,\text{GPC}} = 6200$  g/mol,  $M_w/M_n = 1.72$ ,  $M_{n,\text{NMR}} = 5900$  g/mol); (d)  $^{19}\text{F}$  NMR spectrum of the perfluorocarbon-containing alternating copolymer  $(\text{A2B3})_n$  (Yield% = 67.9%,  $M_{n,\text{GPC}} = 6200$  g/mol,  $M_w/M_n = 1.72$ ,  $M_{n,\text{NMR}} = 5900$  g/mol); (e)  $^1\text{H}$  NMR spectrum of the residues from precipitant (MeOH), obtained through rotary evaporation; (f)  $^{19}\text{F}$  NMR spectrum of the residues from precipitant (MeOH), obtained through rotary evaporation. All the NMR tests were carried out in  $\text{CDCl}_3$ . The detailed sampling process for the *in-situ* NMR tests was described in the experimental part. Polymerization conditions:  $[\text{A2}]_0:[\text{B3}]_0:[\text{Ru}(\text{bpy})_3\text{Cl}_2]_0:[\text{AsAc-Na}]_0 = 1:1:0.01:0.3$ ,  $n_{(\text{B})} = 2.0$  mmol,  $V_{(1,4\text{-dioxane})}:V_{(\text{MeOH})} = 3:1$ ,  $V_{(\text{Total solvent})} = 4.0$  mL, Time = 20 h, irradiation under blue LED at room temperature.

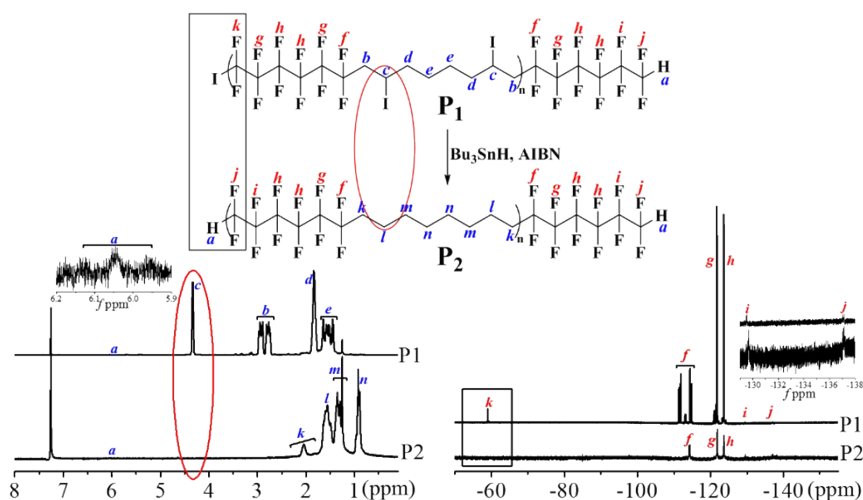

**Figure S3.** Modification for the alternating copolymer  $(\text{A2B3})_n$  and the corresponding NMR ( $^1\text{H}$  and  $^{19}\text{F}$ ) spectra. (Polymerization conditions:  $[\text{A2}]_0:[\text{B3}]_0:[\text{Ru}(\text{bpy})_3\text{Cl}_2]_0:[\text{AsAc-Na}]_0 = 1:1:0.02:0.5$ ,  $n_{(\text{B3})} = 0.5$  mmol,  $V_{(1,4\text{-dioxane})}:V_{(\text{MeOH})}:V_{(\text{Water})} = 3:1:3$ ,  $V_{(\text{Total solvent})} = 7.0$  mL, irradiation under blue LED at room temperature, Time = 20 h). (a) General modification process of the alternating copolymer  $(\text{A2B3})_n$ . (**P1** stands for the original  $(\text{A2B3})_n$  ( $M_{n,\text{GPC}} = 8200$  g/mol,  $M_w/M_n = 2.18$ ,  $M_{n,\text{NMR}} = 6600$  g/mol); **P2** stands for  $(\text{A2B3})_n$  ( $M_{n,\text{GPC}} = 2700$  g/mol,  $M_w/M_n = 1.07$ ,  $M_{n,\text{NMR}} = 4200$  g/mol), which has underwent the reduction reaction.) (b) Comparison of  $^1\text{H}$  NMR spectra of **P1** and **P2**, (c) Comparison of  $^{19}\text{F}$  NMR spectra of **P1** and **P2**. All the NMR tests were carried out in  $\text{CDCl}_3$ .

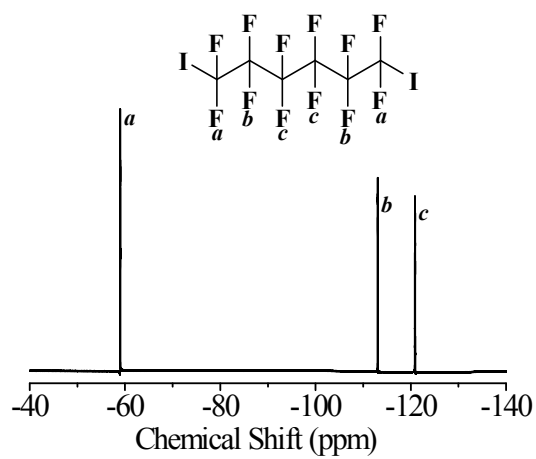

**Figure S4.**  $^{19}\text{F}$  NMR spectrum for **A2** ( $\text{C}_6\text{F}_{12}\text{I}_2$ ) in  $\text{CDCl}_3$ .
